# Supplementary material
Source: PubMed Central journal article supplement (PMC3528401)

## Supplemental Materials

**Table S1.** Primers used in the study

| Primer | Gene               | Orientation | Sequence <sup>†</sup>                                                     |
|--------|--------------------|-------------|---------------------------------------------------------------------------|
| oNP34  | <i>NotI</i> /vIL6  | Backward    | ATACGACGCGGCCGCACC/ATGTGCTGGTTCAAGTTGTGGTC                                |
| oNP35  | <i>Bam</i> HI/vIL6 | Forward     | TACTCAGGATCC/CTTATCGTGGACGTCAGGAGTCA                                      |
| oJGK24 | <i>NotI</i> /hIL6  | Forward     | ATACGACGCGGCCGCACC/ATGAACTCCTTCTCCACAAG                                   |
| oJGK25 | <i>Bam</i> HI/hIL6 | Backward    | TACTCAGGATCC/CATTTGCCGAAGAGCCCTCA                                         |
| oJGK32 | vIL6               | Forward     | ACTGTAGTGCCTT <u>G</u> TGCAGCTTATTGA                                      |
| oJGK33 | vIL6               | Backward    | CACTACAGTC <u>G</u> <u>A</u> <u>A</u> <u>G</u> <u>A</u> AAATTTGACCGCGGTCT |
| oJGK46 | T7/Kozak/vIL6*     | Backward    | TAATACGACTCACTATAGGG/AACAGCCACC/ATGTGCTGGTTCA<br>AGTTG                    |
| oJGK47 | pT/stop/vector*    | Backward    | TTTTTTTTTTTTTTTTTTTTTTTTTTTTTTTTTTTT/TCACTA/CTTGTCATCGT<br>CATCCTT        |
| oJGK51 | vIL6               | Backward    | GGATGCTATGGGTGATCGATG                                                     |
| oJGK52 | vIL6               | Forward     | ACCCTTGCAGATGCCGG                                                         |

\*Kozak, Kozak sequence; pT, poly-T sequence; stop, stop codon; vector, p3FLAG-CMV-14 vector.

<sup>†</sup>Underlines, point mutations.

## Supplemental Figure Legends

**Figure S1.** Construction of vIL6 and hIL6 expression vectors. vIL6 ORF (nt 17875-17264 of the KSHV genome, GenBank accession number U75698) and hIL6 ORF (GenBank accession number NM\_000600) were separately inserted into a p3xFLAG-CMV-14 vector (Sigma) at *NotI* and *BamHI* sites.

**Figure S2.** Copy numbers of miR-608 and miR-1293 in BCBL-1 cells with (+DOX) or without (-DOX) KSHV lytic induction. Doxycycline (DOX)-inducible TREx BCBL-1 RTA and vector control cell lines were used in the study. TREx BCBL1-RTA cells carrying an episomal KSHV genome and a tetracycline-inducible RTA (ORF50) expression vector were cultivated in the presence of doxycycline (1 µg/ml) to induce KSHV lytic infection. Copy numbers of miR-608 and miR-1293 were quantified by qRT-PCR on total small RNA extracted from the cells 24 h after DOX induction.

**Figure S3.** Distribution of endogenous miR-1293 and miR-155 in MCD lymph nodes. Panels show germinal center (GC) distribution of miR-1293 and mantle zone (MZ) distribution of miR-155. No miRNA, no specific miRNA probe. See more details for in situ hybridization in Figure 7. Scale bar represents 200 µm.

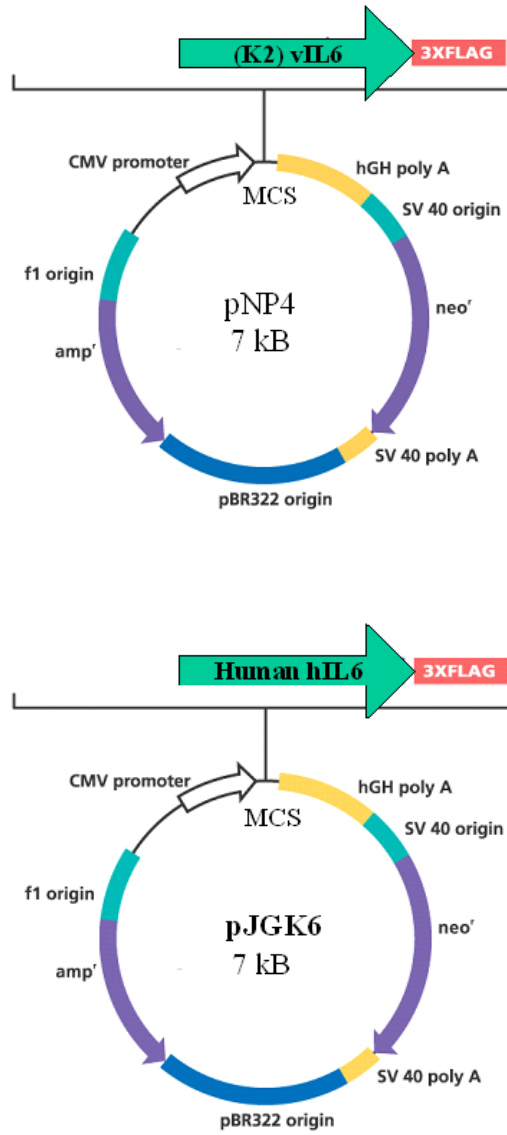

Figure S1

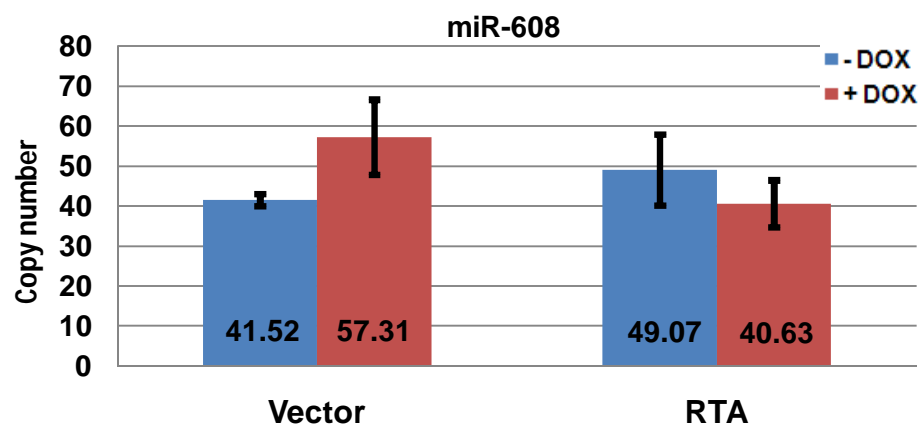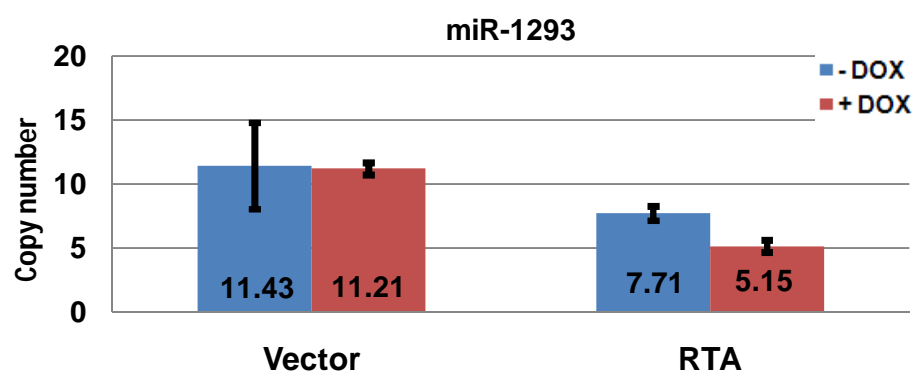

Figure S2

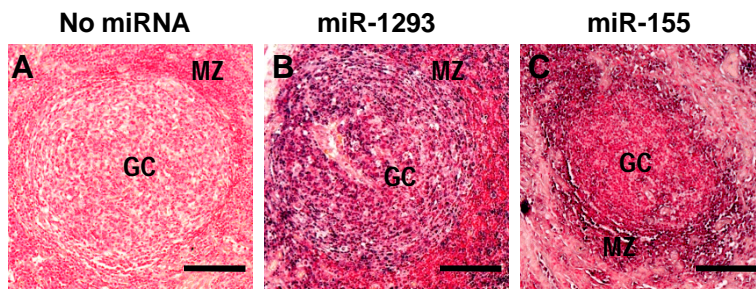

Figure S3

miR-155 expression in the mantle zone regions of  
MCD lymph nodes with KSHV infection

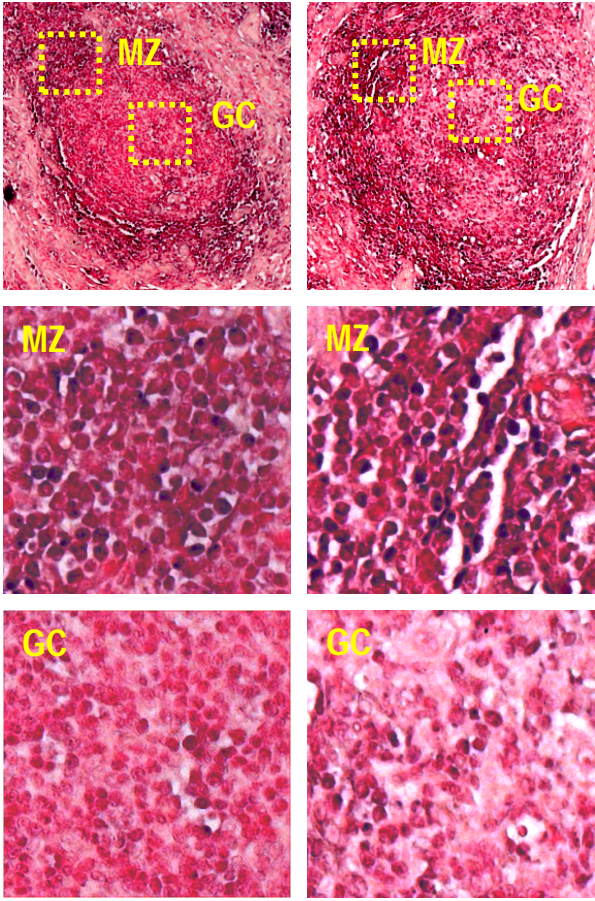

Supplement: NIHMS423648-supplement-supplement_1.pdf [file NIHMS423648-supplement-supplement_1.pdf]
